# Supplementary material
Source: publisher figshare collection journal article supplement (https://karger.figshare.com/articles/dataset/_/4906760)
Supplement: Supplementary file 1 [file 1]

Archive with 2 entries (2 files):
- 468536_sm1.pdf
- 468536_sm2.PDF
