# Supplementary material
Source: publisher figshare collection journal article supplement (https://karger.figshare.com/articles/dataset/_/4906760)

### Cities of origin for the 31 Finnish patients

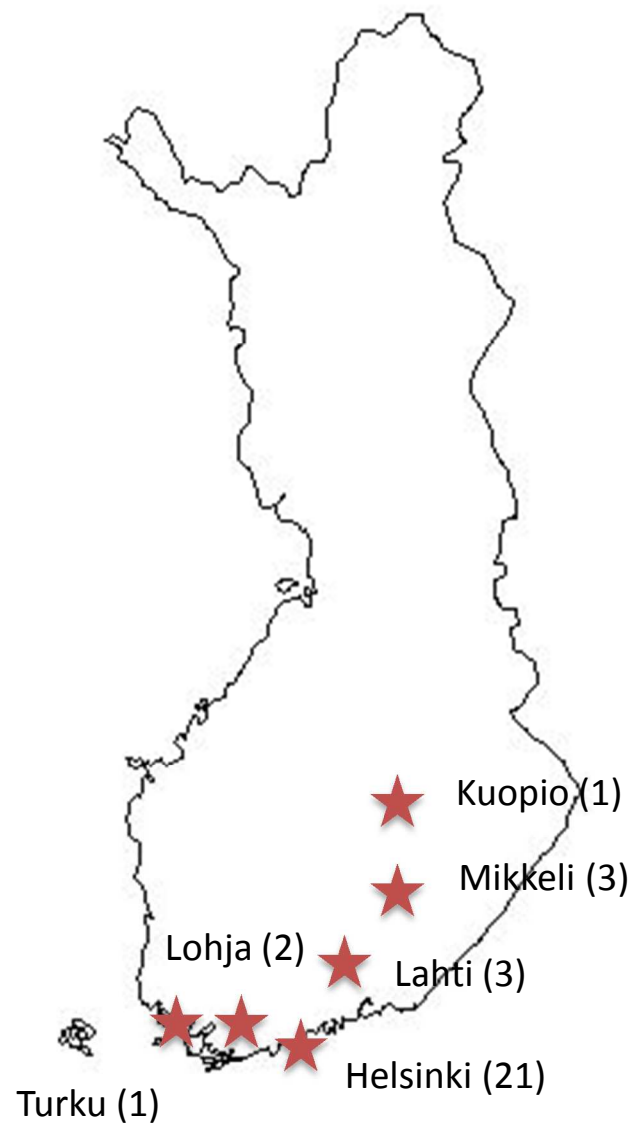

## Characteristics of the patients with tattoo allergies

**Gender**

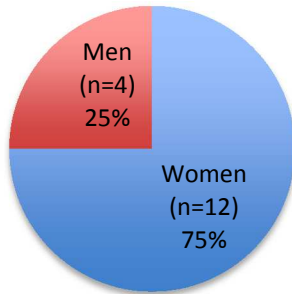

**Professional parlour or home-tattooing**

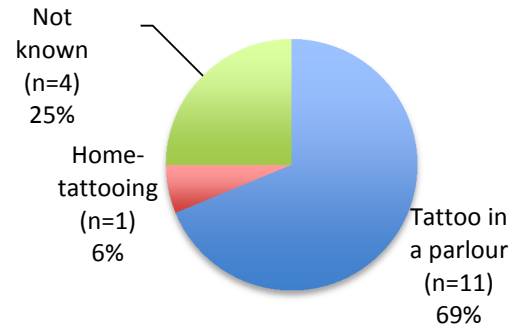

**Tattoo ink color**

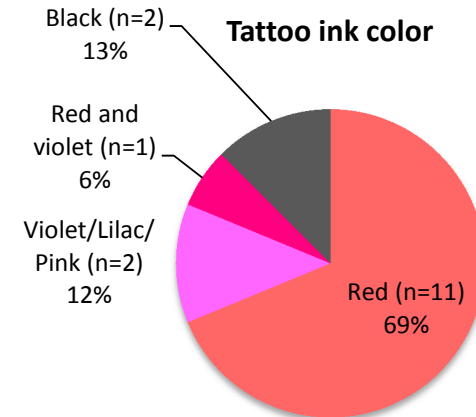

**Tattoo localization**

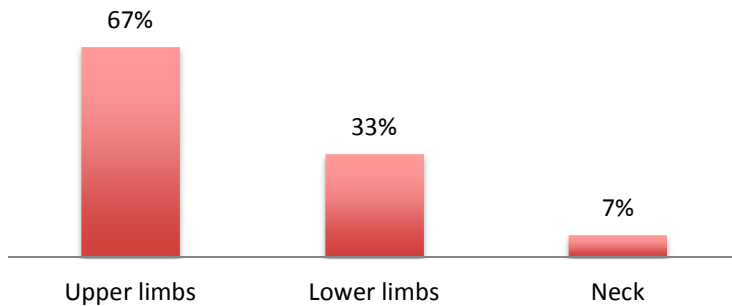

**Distribution and number of tattoos with allergies according to gender**

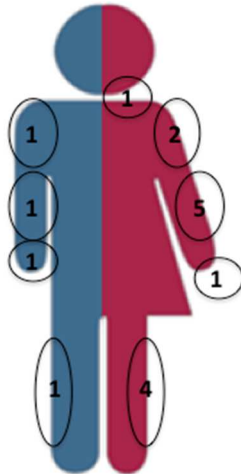

**Histological features**

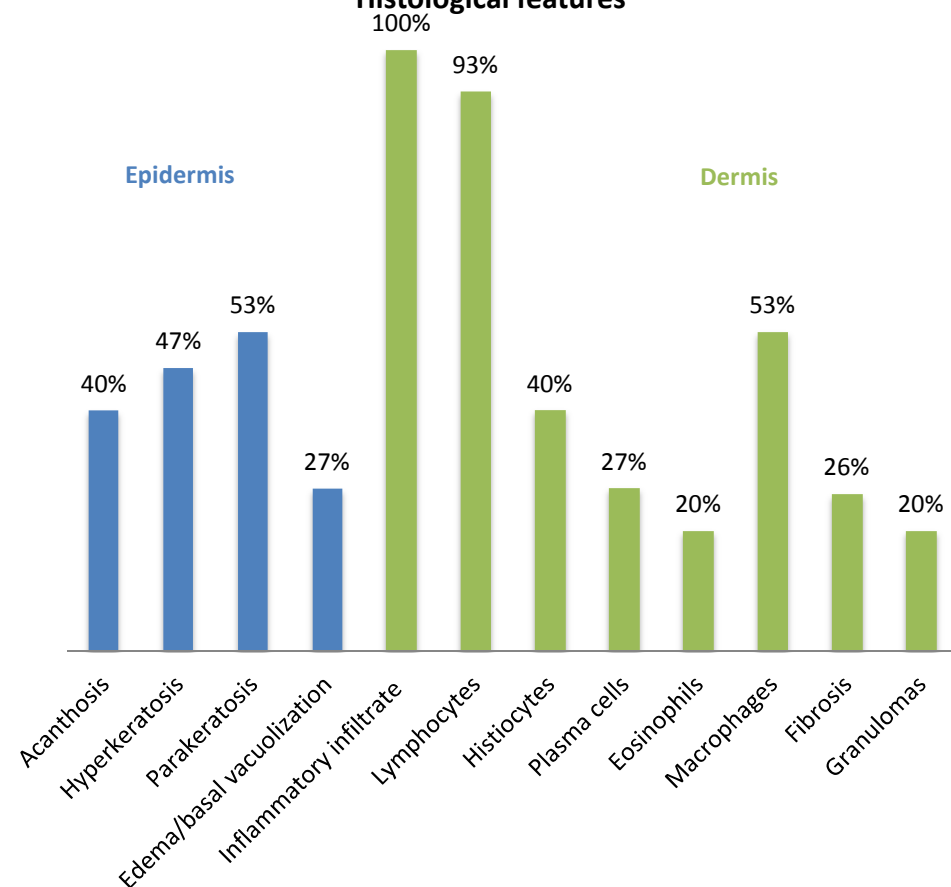

Supplement: Supplementary file 1 [file 1 › 468536_sm2.PDF]
